# Supplementary material for: Realizing cool and warm white-LEDs based on color controllable (Sr,Ba)2Al3O6F:Eu2+ phosphors obtained via a microwave-assisted diffusion method
Source: Royal Society of Chemistry journal article supplement (doi:10.1039/d1cp01593a), 2021-01-01
Supplement: d1cp01593a1.pdf [file d1cp01593a1.pdf]

## Supplementary Information

### **Realizing cool and warm white-LEDs based on color controllable (Sr, Ba)<sub>2</sub>Al<sub>3</sub>O<sub>6</sub>F: Eu<sup>2+</sup> phosphors obtained via a microwave-assisted diffusion method**

P. Ranjith,<sup>a</sup> S. Sreevalsa,<sup>a, b</sup> Pritha Patra,<sup>c</sup> Sudipta Som,<sup>d</sup> Ammu Menon,<sup>e</sup> K. Jayanthi,<sup>f</sup>  
K. Annapurna,<sup>c</sup> N. M. Anoop Krishnan,<sup>e, g</sup> Amarnath R. Allu<sup>h,\*</sup>, Subrata Das<sup>a, b, \*</sup>

<sup>a</sup>Materials Science and Technology Division, CSIR-National Institute for Interdisciplinary Science and Technology, Thiruvananthapuram, Kerala 695019, INDIA

<sup>b</sup>Academy of Scientific and Innovative Research (AcSIR), Ghaziabad 201002, INDIA

<sup>c</sup>Specialty Glass Division, CSIR-Central Glass and Ceramic Research Institute, Kolkata, West Bengal- 700032, INDIA

<sup>d</sup>Department of Chemical Engineering, National Taiwan University, Taipei 10617, Taiwan

<sup>e</sup>Department of Civil Engineering, Indian Institute of Technology Delhi, Hauz Khas, New Delhi-110016, INDIA

<sup>f</sup>School of Molecular Science and Center for Materials of the Universe, Arizona State University, Tempe AZ 85287, United States

<sup>g</sup>Department of Materials Science and Engineering, Indian Institute of Technology Delhi, Hauz Khas, New Delhi-110016, INDIA

<sup>h</sup>Energy Materials and Devices Division, CSIR-Central Glass and Ceramic Research Institute, Kolkata, West Bengal, 700032, INDIA

**\*E-mail: [subratadas@niist.res.in](mailto:subratadas@niist.res.in); [aareddy@cgcric.res.in](mailto:aareddy@cgcric.res.in)**

**Table S1:** The table shows the lattice parameter of the following refined samples.

| Lattice parameters | Sr <sub>2</sub> Al <sub>3</sub> O <sub>6</sub> F | Sr <sub>1.95</sub> Al <sub>3</sub> O <sub>6</sub> F: 0.05Eu <sup>2+</sup> | Sr <sub>1.85</sub> Ba <sub>0.1</sub> Al <sub>3</sub> O <sub>6</sub> F: 0.05Eu <sup>2+</sup> |
|--------------------|--------------------------------------------------|---------------------------------------------------------------------------|---------------------------------------------------------------------------------------------|
| a [Å]              | 17.32375                                         | 17.52476                                                                  | 17.831                                                                                      |
| b [Å]              | 17.32375                                         | 17.52476                                                                  | 17.831                                                                                      |
| c [Å]              | 7.00017                                          | 7.15817                                                                   | 7.224626                                                                                    |
| V[Å <sup>3</sup> ] | 1819.378                                         | 1903.867                                                                  | 1989.012                                                                                    |
| Rp (%)             | 7.2                                              | 6.8                                                                       | 5.6                                                                                         |
| Rwp (%)            | 10.3                                             | 9.2                                                                       | 7.3                                                                                         |

**Table S2:** The table shows the atomic coordinates, fractional occupancies and isotropic displacement parameters of the following compounds.

| <b>Sr<sub>2</sub>Al<sub>3</sub>O<sub>6</sub>F</b> |             |          |          |          |             |                        |
|---------------------------------------------------|-------------|----------|----------|----------|-------------|------------------------|
| <b>Atom</b>                                       | <b>Site</b> | <b>x</b> | <b>y</b> | <b>z</b> | <b>Occ.</b> | <b>B<sub>iso</sub></b> |
| Sr1                                               | 18f         | 0.22320  | 0.41486  | 0.07597  | 1.0         | 2.243                  |
| Sr2                                               | 6c          | 0.00000  | 0.00000  | 0.27710  | 1.0         | 2.63                   |
| Al1                                               | 18f         | 0.59279  | 0.45660  | 0.29840  | 1.0         | 1.846                  |
| Al2                                               | 18f         | 0.64325  | 0.05015  | 0.10267  | 1.0         | 1.819                  |
| O1                                                | 18f         | 0.59430  | 0.54030  | 0.44580  | 1.0         | 1.57                   |
| O2                                                | 18f         | 0.14001  | 0.11132  | 0.11725  | 1.0         | 2.59                   |
| O3                                                | 18f         | 0.55819  | 0.07728  | 0.11751  | 1.0         | 2.16                   |
| O4                                                | 18f         | 0.60087  | -0.05778 | 0.19406  | 1.0         | 1.98                   |
| F1                                                | 18f         | 0.34113  | 0.56813  | 0.17990  | 0.667       | 7.6                    |

  

| <b>Sr<sub>1.95</sub>Al<sub>3</sub>O<sub>6</sub>F: 0.05Eu<sup>2+</sup></b> |             |          |          |          |             |                        |
|---------------------------------------------------------------------------|-------------|----------|----------|----------|-------------|------------------------|
| <b>Atom</b>                                                               | <b>Site</b> | <b>x</b> | <b>y</b> | <b>z</b> | <b>Occ.</b> | <b>B<sub>iso</sub></b> |
| Sr1                                                                       | 18f         | 0.22240  | 0.43487  | 0.43487  | 0.995       | 2.235                  |
| Eu1                                                                       | 18f         | 0.22240  | 0.43487  | 0.43487  | 0.005       | 2.235                  |
| Sr2                                                                       | 6c          | 0.00000  | 0.00000  | 0.26910  | 0.985       | 2.710                  |
| Eu2                                                                       | 6c          | 0.00000  | 0.00000  | 0.26910  | 0.015       | 2.710                  |
| Al1                                                                       | 18f         | 0.59863  | 0.48560  | 0.29840  | 1.0         | 1.846                  |
| Al2                                                                       | 18f         | 0.64325  | 0.05015  | 0.10267  | 1.0         | 1.829                  |
| O1                                                                        | 18f         | 0.59430  | 0.57030  | 0.44580  | 1.0         | 1.570                  |
| O2                                                                        | 18f         | 0.14001  | 0.12150  | 0.11689  | 1.0         | 2.580                  |
| O3                                                                        | 18f         | 0.55819  | 0.07728  | 0.11751  | 1.0         | 2.360                  |
| O4                                                                        | 18f         | 0.59087  | -0.05678 | 0.19806  | 1.0         | 1.890                  |
| F1                                                                        | 18f         | 0.34113  | 0.56813  | 0.17990  | 0.667       | 7.650                  |

  

| <b>Sr<sub>1.85</sub>Ba<sub>0.1</sub>Al<sub>3</sub>O<sub>6</sub>F: 0.05Eu<sup>2+</sup></b> |             |          |          |          |             |                        |
|-------------------------------------------------------------------------------------------|-------------|----------|----------|----------|-------------|------------------------|
| <b>Atom</b>                                                                               | <b>Site</b> | <b>x</b> | <b>y</b> | <b>z</b> | <b>Occ.</b> | <b>B<sub>iso</sub></b> |
| Sr1                                                                                       | 18f         | 0.22515  | 0.41278  | 0.07182  | 0.950       | 0.021                  |
| Eu1                                                                                       | 18f         | 0.24195  | 0.42515  | 0.09977  | 0.050       | -0.61                  |
| Sr2                                                                                       | 6c          | 0.00000  | 0.00000  | 0.26413  | 0.850       | -0.089                 |
| Eu2                                                                                       | 6c          | 0.00000  | 0.00000  | 0.26288  | 0.050       | -0.5                   |
| Ba2                                                                                       | 6c          | 0.00000  | 0.00000  | 0.26360  | 0.100       | 0.2                    |
| Al1                                                                                       | 18f         | 0.59318  | 0.45486  | 0.31397  | 1.0         | 0.018                  |
| Al2                                                                                       | 18f         | 0.64215  | 0.04782  | 0.13585  | 1.0         | -0.042                 |
| O1                                                                                        | 18f         | 0.59536  | 0.53120  | 0.43280  | 1.0         | -0.271                 |
| O2                                                                                        | 18f         | 0.12773  | 0.10096  | 0.10625  | 1.0         | -0.65                  |
| O3                                                                                        | 18f         | 0.55500  | 0.06859  | 0.10211  | 1.0         | -0.59                  |
| O4                                                                                        | 18f         | 0.61347  | -0.05636 | 0.21042  | 1.0         | -1.71                  |
| F1                                                                                        | 18f         | 0.415    | 0.541    | 0.098    | 0.667       | 0.025                  |

**Table S3:** The bonds and corresponding bond lengths that exist between the elements in the following samples.

| <b>Sr<sub>2</sub>Al<sub>3</sub>O<sub>6</sub>F</b> |                        | <b>Sr<sub>1.95</sub>Al<sub>3</sub>O<sub>6</sub>F: 0.05Eu<sup>2+</sup></b> |                        | <b>Sr<sub>1.85</sub>Ba<sub>0.1</sub>Al<sub>3</sub>O<sub>6</sub>F: 0.05Eu<sup>2+</sup></b> |                        |
|---------------------------------------------------|------------------------|---------------------------------------------------------------------------|------------------------|-------------------------------------------------------------------------------------------|------------------------|
| <b>Bond type</b>                                  | <b>Bond length [Å]</b> | <b>Bond type</b>                                                          | <b>Bond length [Å]</b> | <b>Bond type</b>                                                                          | <b>Bond length [Å]</b> |
| Sr1-O1 × 2                                        | 2.572 (2)              | Sr1-O1 × 2                                                                | 2.785 (2)              | Sr1-O1 × 2                                                                                | 2.659 (2)              |
| Sr1-O2 × 1                                        | 2.681 (1)              | Sr1-O2 × 1                                                                | 2.64 (1)               | Sr1-O3 × 2                                                                                | 2.643 (2)              |
| Sr1-O3 × 2                                        | 2.637 (2)              | Sr1-O3 × 2                                                                | 2.825 (2)              | Sr1-O4 × 2                                                                                | 2.636 (2)              |
| Sr1-O4 × 2                                        | 2.465 (2)              | Sr1-O4 × 2                                                                | 2.50 (2)               | Sr1-F × 2                                                                                 | 2.280 (2)              |
| Sr1-F1 × 2                                        | 2.501 (2)              | Sr1-F1 × 2                                                                | 2.255 (2)              | Sr1-Eu1 × 1                                                                               | 3.852 (1)              |
| Sr2-O2 × 3                                        | 2.485 (3)              | Sr2-O2 × 3                                                                | 2.55 (3)               | Sr1-Ba2 × 1                                                                               | 4.065 (1)              |
| Sr2-F1 × 6                                        | 2.367 (6)              | Sr2-F1 × 6                                                                | 2.445 (2)              | Sr1-Al1 × 1                                                                               | 3.288 (1)              |
| Al1-O1 × 1                                        | 1.769 (1)              | Al1-O1 × 1                                                                | 1.853 (1)              | Sr1-Al2 × 1                                                                               | 3.264 (1)              |
| Al1-O2 × 2                                        | 1.765 (2)              | Al1-O2 × 2                                                                | 1.74 (1)               | Sr2-Sr2 × 1                                                                               | 3.611 (1)              |
| Al1-O3 × 1                                        | 1.724 (1)              | Al1-O3 × 1                                                                | 1.772 (1)              | Sr2-Eu2 × 1                                                                               | 3.416 (1)              |
| Al2-O1 × 1                                        | 1.729 (1)              | Al1-O3 × 1                                                                | 1.772 (1)              | Sr2-Ba2 × 1                                                                               | 3.611 (1)              |
| Al2-O3 × 1                                        | 1.759 (1)              | Al2-O1 × 1                                                                | 1.682 (1)              | Sr2-O2 × 3                                                                                | 2.372 (3)              |
| Al2-O4 × 2                                        | 1.753 (2)              | Al2-O3 × 1                                                                | 1.780 (1)              | Al1-O1 × 1                                                                                | 1.593 (1)              |
|                                                   |                        | Al2-O4 × 1                                                                | 1.761 (1)              | Al1-O2 × 2                                                                                | 1.801 (2)              |
|                                                   |                        | Eu1-O1 × 2                                                                | 2.785 (2)              | Al1-O3 × 1                                                                                | 2.034 (1)              |
|                                                   |                        | Eu1-O3 × 1                                                                | 2.92 (1)               | Al2-O1 × 1                                                                                | 1.786 (1)              |
|                                                   |                        | Eu1-O4 × 3                                                                | 2.64 (3)               | Al2-O3 × 1                                                                                | 1.785 (1)              |
|                                                   |                        | Eu2-O2 × 1                                                                | 2.55(1)                | Al2-O4 × 2                                                                                | 1.823 (2)              |
|                                                   |                        | Eu2-F1 × 2                                                                | 2.445 (2)              | Eu1-O3 × 2                                                                                | 2.627 (2)              |
|                                                   |                        |                                                                           |                        | Eu1-O4 × 1                                                                                | 2.161 (1)              |
|                                                   |                        |                                                                           |                        | Eu1-F × 2                                                                                 | 2.085 (2)              |
|                                                   |                        |                                                                           |                        | Eu2-Eu2 × 2                                                                               | 3.611 (2)              |
|                                                   |                        |                                                                           |                        | Eu2-Eu2 × 1                                                                               | 3.425 (1)              |
|                                                   |                        |                                                                           |                        | Eu2-Ba2 × 1                                                                               | 3.420 (1)              |
|                                                   |                        |                                                                           |                        | Eu2-O2 × 3                                                                                | 2.368 (3)              |
|                                                   |                        |                                                                           |                        | Ba2-Sr1 × 3                                                                               | 4.065 (3)              |
|                                                   |                        |                                                                           |                        | Ba2-Eu1 × 2                                                                               | 3.960 (2)              |
|                                                   |                        |                                                                           |                        | Ba2-Sr2 × 2                                                                               | 3.611 (2)              |
|                                                   |                        |                                                                           |                        | Ba2-Eu2 × 2                                                                               | 3.611 (2)              |
|                                                   |                        |                                                                           |                        | Ba2-Ba2 × 2                                                                               | 3.612 (2)              |
|                                                   |                        |                                                                           |                        | Ba2-O2 × 2                                                                                | 2.370 (2)              |
